# Supplementary material for: Predictive Value of Neutrophil-to-Lymphocyte Ratio(NLR) and Platelet-to-Lymphocyte Ratios (PLR) for Lymph Node Metastasis in Rectal Cancer Patients: a retrospective cohort study
Source: Research Square preprint supplement (doi:10.21203/rs.3.rs-5937143/v1), 2025-04-01
Supplement: Supplementary file 1 [file d01c5f6f6508c78c11acbe04.xlsx]

## Sheet: Sheet1
曲线的坐标						曲线的坐标
检验结果变量: NLR						检验结果变量: PLR
大于或等于此值时为正a	敏感度	1 - 特异性	约登指数			大于或等于此值时为正a	敏感度	1 - 特异性	约登指数
-0.37	1	1	0			12.33	1	1	0
0.64	1	0.989	0.011			34.465	0.988	1	-0.012
0.66	1	0.979	0.021			58.215	0.988	0.989	-0.001
0.695	0.988	0.979	0.009			61.48	0.988	0.979	0.009
0.765	0.988	0.968	0.02			62.67	0.988	0.968	0.02
0.82	0.977	0.968	0.009			63.69	0.988	0.958	0.03
0.855	0.977	0.958	0.019			65.835	0.977	0.958	0.019
0.94	0.977	0.947	0.03			68.51	0.977	0.947	0.03
1.02	0.953	0.947	0.006			69.76	0.977	0.937	0.04
1.045	0.953	0.937	0.016			70.555	0.977	0.926	0.051
1.065	0.942	0.937	0.005			71.985	0.977	0.916	0.061
1.095	0.942	0.926	0.016			72.93	0.965	0.916	0.049
1.125	0.93	0.926	0.004			73.535	0.965	0.905	0.06
1.155	0.93	0.916	0.014			75.555	0.953	0.905	0.048
1.175	0.919	0.916	0.003			77.945	0.953	0.895	0.058
1.205	0.919	0.895	0.024			79.425	0.953	0.884	0.069
1.24	0.907	0.895	0.012			80.735	0.953	0.874	0.079
1.26	0.895	0.884	0.011			81.91	0.953	0.863	0.09
1.285	0.884	0.874	0.01			82.84	0.953	0.853	0.1
1.305	0.884	0.863	0.021			83.475	0.953	0.842	0.111
1.315	0.872	0.853	0.019			84.935	0.953	0.832	0.121
1.325	0.872	0.842	0.03			86.375	0.953	0.821	0.132
1.345	0.872	0.832	0.04			86.69	0.953	0.8	0.153
1.365	0.86	0.832	0.028			87.01	0.953	0.789	0.164
1.375	0.837	0.832	0.005			87.18	0.953	0.779	0.174
1.395	0.826	0.832	-0.006			87.295	0.942	0.779	0.163
1.42	0.826	0.821	0.005			87.59	0.942	0.768	0.174
1.435	0.814	0.811	0.003			89.095	0.942	0.758	0.184
1.45	0.791	0.811	-0.02			91.38	0.93	0.758	0.172
1.47	0.779	0.811	-0.032			93.815	0.93	0.747	0.183
1.49	0.779	0.8	-0.021			95.565	0.919	0.747	0.172
1.515	0.779	0.789	-0.01			96.83	0.907	0.747	0.16
1.535	0.779	0.768	0.011			97.805	0.907	0.737	0.17
1.545	0.767	0.758	0.009			98.2	0.907	0.726	0.181
1.56	0.767	0.747	0.02			98.73	0.884	0.726	0.158
1.58	0.744	0.737	0.007			98.97	0.872	0.726	0.146
1.595	0.733	0.737	-0.004			99.23	0.86	0.726	0.134
1.605	0.721	0.737	-0.016			100.37	0.86	0.716	0.144
1.615	0.721	0.726	-0.005			101.535	0.86	0.705	0.155
1.625	0.709	0.716	-0.007			102.3	0.849	0.705	0.144
1.64	0.698	0.705	-0.007			102.97	0.837	0.705	0.132
1.66	0.698	0.695	0.003			103.36	0.826	0.705	0.121
1.695	0.698	0.674	0.024			103.855	0.826	0.695	0.131
1.73	0.686	0.674	0.012			104.535	0.826	0.684	0.142
1.745	0.674	0.674	0			105.5	0.814	0.684	0.13
1.755	0.663	0.674	-0.011			106.055	0.814	0.674	0.14
1.78	0.651	0.653	-0.002			106.325	0.814	0.663	0.151
1.815	0.64	0.642	-0.002			106.77	0.814	0.653	0.161
1.845	0.64	0.611	0.029			107.31	0.802	0.653	0.149
1.875	0.64	0.6	0.04			107.7	0.802	0.642	0.16
1.895	0.628	0.6	0.028			108.12	0.791	0.642	0.149
1.92	0.628	0.589	0.039			108.565	0.791	0.632	0.159
1.945	0.605	0.558	0.047			108.95	0.791	0.621	0.17
1.975	0.593	0.558	0.035			109.27	0.779	0.621	0.158
2.025	0.558	0.526	0.032			109.655	0.767	0.621	0.146
2.055	0.547	0.526	0.021			110.215	0.756	0.621	0.135
2.065	0.523	0.495	0.028			110.715	0.744	0.621	0.123
2.075	0.5	0.495	0.005			111.29	0.733	0.621	0.112
2.085	0.5	0.484	0.016			111.86	0.721	0.621	0.1
2.1	0.488	0.474	0.014			112.155	0.709	0.621	0.088
2.12	0.477	0.463	0.014			112.475	0.709	0.611	0.098
2.14	0.477	0.453	0.024			112.98	0.698	0.611	0.087
2.195	0.453	0.453	0			113.255	0.698	0.6	0.098
2.245	0.453	0.442	0.011			113.57	0.686	0.6	0.086
2.27	0.453	0.421	0.032			113.85	0.674	0.6	0.074
2.3	0.442	0.411	0.031			114.09	0.674	0.589	0.085
2.32	0.442	0.4	0.042			114.925	0.663	0.589	0.074
2.345	0.43	0.389	0.041			115.635	0.663	0.579	0.084
2.37	0.419	0.389	0.03			116.015	0.663	0.568	0.095
2.385	0.419	0.379	0.04			116.73	0.663	0.558	0.105
2.395	0.407	0.379	0.028			117.435	0.651	0.558	0.093
2.415	0.395	0.379	0.016			118.065	0.64	0.558	0.082
2.44	0.384	0.379	0.005			120.27	0.628	0.558	0.07
2.495	0.372	0.379	-0.007			122.405	0.616	0.558	0.058
2.545	0.349	0.379	-0.03			123.085	0.605	0.558	0.047
2.575	0.349	0.368	-0.019			124.085	0.605	0.547	0.058
2.645	0.337	0.368	-0.031			125.585	0.593	0.547	0.046
2.7	0.337	0.358	-0.021			126.71	0.581	0.547	0.034
2.715	0.337	0.347	-0.01			127.625	0.57	0.547	0.023
2.725	0.326	0.347	-0.021			129.165	0.57	0.537	0.033
2.755	0.314	0.326	-0.012			130.415	0.547	0.537	0.01
2.79	0.314	0.316	-0.002			131.885	0.535	0.537	-0.002
2.825	0.302	0.316	-0.014			133.47	0.535	0.526	0.009
2.86	0.302	0.305	-0.003			134.29	0.523	0.526	-0.003
2.875	0.302	0.295	0.007			135.105	0.512	0.516	-0.004
2.885	0.302	0.274	0.028			136.815	0.5	0.516	-0.016
2.905	0.291	0.274	0.017			138.12	0.5	0.505	-0.005
2.93	0.291	0.263	0.028			138.285	0.5	0.495	0.005
2.945	0.291	0.253	0.038			138.885	0.5	0.484	0.016
2.975	0.279	0.242	0.037			139.72	0.5	0.474	0.026
3.04	0.267	0.242	0.025			140.555	0.5	0.463	0.037
3.09	0.267	0.232	0.035			141.325	0.5	0.453	0.047
3.135	0.267	0.221	0.046			141.56	0.488	0.442	0.046
3.195	0.267	0.211	0.056			142.04	0.488	0.432	0.056
3.275	0.256	0.211	0.045			142.79	0.477	0.432	0.045
3.34	0.256	0.2	0.056			143.76	0.477	0.421	0.056
3.375	0.244	0.179	0.065			144.72	0.465	0.411	0.054
3.415	0.221	0.179	0.042			146.03	0.465	0.4	0.065
3.465	0.209	0.179	0.03			147.695	0.465	0.389	0.076
3.585	0.186	0.168	0.018			148.83	0.453	0.389	0.064
3.685	0.174	0.168	0.006			150.775	0.43	0.379	0.051
3.735	0.174	0.158	0.016			152.985	0.419	0.368	0.051
3.795	0.163	0.158	0.005			155.035	0.407	0.368	0.039
3.835	0.151	0.158	-0.007			156.495	0.395	0.368	0.027
3.855	0.151	0.147	0.004			156.97	0.384	0.368	0.016
3.995	0.14	0.147	-0.007			157.385	0.384	0.358	0.026
4.14	0.128	0.147	-0.019			158.085	0.372	0.358	0.014
4.16	0.116	0.147	-0.031			159.335	0.36	0.358	0.002
4.2	0.116	0.137	-0.021			161.43	0.349	0.358	-0.009
4.245	0.116	0.126	-0.01			163.27	0.349	0.347	0.002
4.275	0.116	0.116	0			163.715	0.337	0.347	-0.01
4.31	0.116	0.105	0.011			163.875	0.326	0.347	-0.021
4.44	0.105	0.105	0			165.53	0.314	0.347	-0.033
4.56	0.105	0.095	0.01			167.1	0.314	0.337	-0.023
4.7	0.093	0.095	-0.002			167.32	0.314	0.326	-0.012
4.915	0.093	0.084	0.009			168.365	0.314	0.316	-0.002
5.065	0.081	0.084	-0.003			169.305	0.314	0.305	0.009
5.175	0.07	0.084	-0.014			169.69	0.314	0.295	0.019
5.36	0.07	0.074	-0.004			170.385	0.314	0.284	0.03
5.565	0.058	0.074	-0.016			171.635	0.314	0.274	0.04
5.725	0.047	0.074	-0.027			172.585	0.314	0.263	0.051
5.98	0.047	0.063	-0.016			174.585	0.314	0.253	0.061
6.195	0.035	0.063	-0.028			176.71	0.302	0.253	0.049
6.46	0.023	0.063	-0.04			177.935	0.291	0.253	0.038
6.765	0.023	0.053	-0.03			179.475	0.279	0.253	0.026
6.875	0.023	0.042	-0.019			180.555	0.279	0.242	0.037
8.03	0.023	0.032	-0.009			181.27	0.267	0.242	0.025
9.25	0.012	0.032	-0.02			182.48	0.256	0.242	0.014
10.665	0.012	0.021	-0.009			185.59	0.256	0.232	0.024
12.165	0.012	0.011	0.001			187.945	0.244	0.232	0.012
16.095	0.012	0	0.012			188.565	0.233	0.232	0.001
20.86	0	0	0			189.445	0.221	0.232	-0.011
		1	0.065			192.06	0.221	0.221	0
						194.915	0.221	0.211	0.01
						197.44	0.209	0.211	-0.002
						200.04	0.209	0.2	0.009
						201.225	0.198	0.2	-0.002
						202.695	0.186	0.2	-0.014
						204.425	0.186	0.189	-0.003
						205.735	0.174	0.189	-0.015
						207.465	0.163	0.189	-0.026
						211.955	0.163	0.179	-0.016
						215.64	0.163	0.168	-0.005
						217.915	0.151	0.168	-0.017
						220.59	0.14	0.168	-0.028
						224.16	0.14	0.158	-0.018
						227.205	0.128	0.158	-0.03
						227.845	0.116	0.158	-0.042
						231.935	0.105	0.158	-0.053
						236.725	0.105	0.147	-0.042
						240.665	0.093	0.147	-0.054
						243.485	0.093	0.137	-0.044
						244.32	0.093	0.126	-0.033
						246	0.081	0.126	-0.045
						253	0.081	0.116	-0.035
						268.785	0.07	0.116	-0.046
						280.355	0.058	0.116	-0.058
						283.215	0.058	0.105	-0.047
						287.145	0.047	0.105	-0.058
						294.545	0.035	0.105	-0.07
						299.545	0.023	0.105	-0.082
						304.165	0.012	0.105	-0.093
						309.79	0.012	0.095	-0.083
						311.34	0.012	0.084	-0.072
						312.935	0.012	0.074	-0.062
						318.885	0.012	0.063	-0.051
						335	0.012	0.053	-0.041
						351.67	0.012	0.042	-0.03
						381.97	0.012	0.032	-0.02
						408.635	0.012	0.021	-0.009
						430	0	0.021	-0.021
						530.555	0	0.011	-0.011
						612.11	0	0	0
									0.184
